# Supplementary figures and images for: Intravenous vortioxetine to accelerate onset of effect in major depressive disorder: a 7-day randomized, double-blind, placebo-controlled exploratory study
Source: PubMed Central journal article supplement — Int Clin Psychopharmacol. 2020 Aug 7;35(6):305–12. doi: 10.1097/YIC.0000000000000326 (PMC7531504; doi:10.1097/yic.0000000000000326), 2020-08-07

Supplemental Digital Content : Figure

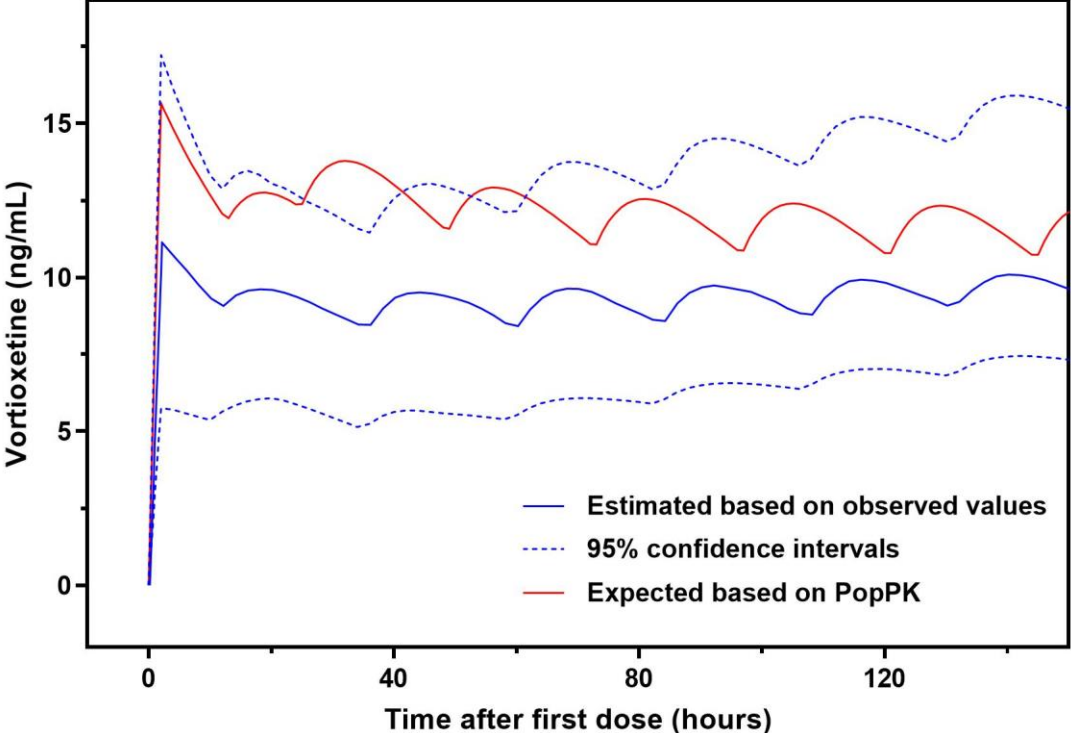

Supplement: icp-35-305-s001.pdf [file icp-35-305-s001.pdf]
